# Supplementary material
Source: MDPI journal article supplement (https://www.mdpi.com/2073-4441/11/2/228)
Supplement: s1 [file s1]

# Water Price Prediction for Increasing Market Efficiency Using Random Forest Regression: A Case Study in the Western United States

Ziyao Xu <sup>1,2</sup>, Jijian Lian <sup>1</sup>, Lingling Bin <sup>1,\*</sup>, Kaixun Hua <sup>3,\*</sup>, Kui Xu <sup>1</sup> and Hoi Yi Chan <sup>4</sup>

<sup>1</sup> State Key Laboratory of Hydraulic Engineering Simulation and Safety, Tianjin University, 92 Wei Jin Road, Nan Kai District, Tianjin 300072, China; zx66@cornell.edu (Z.X.); jjlian@tju.edu.cn (J.L.); jackykui@126.com (K.X.)

<sup>2</sup> Comprehensive Development and Management Center, Ministry of Water Resources of China, 10 Nan Xian Ge Street, Xi Cheng District, Beijing 100053, China

<sup>3</sup> Department of Computer Science, University of Massachusetts Boston, 100 Morrissey Boulevard, Boston, MA 02125-3393, USA

<sup>4</sup> College of Agriculture and Life Sciences, Cornell University, Ithaca, NY 14853, USA; hc747@cornell.edu

\* Correspondence: binll@tju.edu.cn (L.B.); kaixun.hua001@umb.edu (K.H.); Tel.: +86-22-2740-1127 (L.B.); +01-607-379-9785 (K.H.)

**Table S1.** Deflated Water Transfer Prices by Duration and Transfer-Direction, 1987–2010<sup>a</sup> (per Committed Acre-foot).

|                                | Sales           |            |              | One-Year Leases |            |              | Mid-Term Leases <sup>b</sup> |            |              | Long-Term Leases <sup>b</sup> |            |              |
|--------------------------------|-----------------|------------|--------------|-----------------|------------|--------------|------------------------------|------------|--------------|-------------------------------|------------|--------------|
|                                | Number of Cases | Mean Price | Median Price | Number of Cases | Mean Price | Median Price | Number of Cases              | Mean Price | Median Price | Number of Cases               | Mean Price | Median Price |
| Agriculture-Agriculture        | 224             | 265.90     | 143.58       | 234             | 67.31      | 24.81        | 9                            | 24.09      | 9.59         | 25                            | 32.12      | 8.11         |
| Agriculture-Urban <sup>c</sup> | 1173            | 439.24     | 311.29       | 165             | 152.49     | 69.32        | 47                           | 153.88     | 115.48       | 46                            | 174.94     | 50.68        |
| Agriculture-Environment        | 72              | 269.92     | 92.80        | 181             | 62.84      | 50.71        | 33                           | 202.33     | 44.39        | 8                             | 87.25      | 28.53        |
| Urban-Urban                    | 191             | 195.52     | 110.52       | 109             | 274.68     | 110.05       | 24                           | 201.51     | 129.78       | 15                            | 526.10     | 106.85       |
| Urban-Agriculture              | 10              | 23.45      | 4.82         | 22              | 135.31     | 21.76        | 3                            | 16.34      | 3.72         | 0                             | ---        | ---          |
| Urban-Environment              | 6               | 19.45      | 5.31         | 47              | 46.83      | 51.53        | 6                            | 65.88      | 70.01        | 1                             | 354.77     | 354.77       |
| Miscellaneous <sup>d</sup>     | 36              | 233.78     | 98.71        | 90              | 91.11      | 44.68        | 3                            | 9.17       | 9.30         | 3                             | 357.54     | 213.65       |

<sup>a</sup> Year 2010 dollars per committed acre-foot; “exchange” trades are not included. <sup>b</sup> Mid-term leases refer to leases >2 years and ≤ 10 years; long-term leases refer to leases >10 years. <sup>c</sup> Urban includes water uses for cities, towns, municipal water districts and industries. <sup>d</sup> Miscellaneous includes Environment-Environment, recycled and combination trades. Combination refers to transfers that involve multiple original or new uses; recycled refers to water reuse after treatment.

**Table S2.** Deflated Water Transfer Prices by State and Duration, 1987–2010 <sup>a</sup> (per Committed Acre-foot).

|            | Sales           |            |              | One-Year Leases |            |              | Mid-Term Leases <sup>b</sup> |            |              | Long-Term Leases <sup>b</sup> |            |              |
|------------|-----------------|------------|--------------|-----------------|------------|--------------|------------------------------|------------|--------------|-------------------------------|------------|--------------|
|            | Number of Cases | Mean Price | Median Price | Number of Cases | Mean Price | Median Price | Number of Cases              | Mean Price | Median Price | Number of Cases               | Mean Price | Median Price |
| Arizona    | 103             | 95.46      | 82.63        | 45              | 215.39     | 82.58        | 11                           | 247.32     | 296.68       | 3                             | 82.21      | 88.24        |
| California | 50              | 139.24     | 72.20        | 321             | 141.35     | 89.06        | 23                           | 326.82     | 108.68       | 18                            | 510.67     | 152.59       |
| Colorado   | 1236            | 459.01     | 340.32       | 99              | 134.52     | 21.58        | 10                           | 117.79     | 37.52        | 24                            | 181.61     | 39.29        |
| Idaho      | 18              | 8.24       | 5.72         | 85              | 22.27      | 7.86         | 0                            | ---        | ---          | 3                             | 27.15      | 31.42        |
| Montana    | 2               | 181.61     | 181.61       | 15              | 32.30      | 25.62        | 21                           | 57.48      | 20.64        | 12                            | 18.16      | 16.93        |
| New Mexico | 59              | 182.01     | 152.52       | 56              | 57.04      | 52.35        | 8                            | 63.49      | 70.01        | 3                             | 163.34     | 133.19       |
| Nevada     | 92              | 383.56     | 224.94       | 4               | 44.27      | 43.37        | 2                            | 334.50     | 334.50       | 2                             | 335.28     | 335.28       |
| Oregon     | 17              | 13.02      | 10.13        | 49              | 41.73      | 22.00        | 10                           | 69.24      | 23.72        | 7                             | 28.14      | 13.01        |
| Texas      | 70              | 61.72      | 45.70        | 101             | 150.02     | 36.68        | 32                           | 145.99     | 120.28       | 20                            | 169.01     | 65.91        |
| Utah       | 49              | 82.76      | 50.32        | 14              | 34.56      | 8.87         | 3                            | 19.20      | 13.18        | 1                             | 20.70      | 20.70        |
| Washington | 12              | 58.18      | 38.15        | 19              | 108.57     | 38.69        | 5                            | 42.61      | 38.39        | 0                             | ---        | ---          |
| Wyoming    | 4               | 94.26      | 102.76       | 41              | 42.51      | 41.96        | 0                            | ---        | ---          | 5                             | 2.36       | 2.33         |
| All        | 1712            | 374.03     | 188.34       | 849             | 112.63     | 50.71        | 125                          | 155.47     | 83.09        | 98                            | 192.52     | 34.32        |

<sup>a</sup> Year 2010 dollars per committed acre-foot; “exchange” trades are not included. <sup>b</sup> Mid-term leases refer to leases >2 years and ≤ 10 years; long-term leases refer to leases >10 years.
